# Supplementary material for: Genetic diversity and population structure of bermudagrass (Cynodon spp.) revealed by genotyping-by-sequencing
Source: Front Plant Sci. 2023 Jun 8;14:1155721. doi: 10.3389/fpls.2023.1155721 (PMC10285298; doi:10.3389/fpls.2023.1155721)
Supplement: Supplementary file 2 [file DataSheet_2.xlsx]

## Sheet: Sheet1
Dataset contains source information (ID, species, ploidy, program, origin, genome size) of all 206 Cynodon accessions used in the study.
Taxa	Species	Ploidy	Program	Continent	Origin	2C DNA (pg)
A12193	Cynodon dactylon		OSU	North America	Campus of Michigan State University, United States
A12269	Cynodon dactylon		OSU	Asia	China
A12281	Cynodon dactylon		OSU	Asia	China
A12313	Cynodon dactylon		OSU	Asia	China
A12342	Cynodon dactylon		OSU	Asia	China
A12347	Cynodon dactylon		OSU	Asia	China
A12367	Cynodon dactylon		OSU	Asia	China
A12378	Cynodon dactylon		OSU	Australia	Australia
A12395	Cynodon dactylon		OSU	North America	Puerto Rico, United States
A12397	Cynodon dactylon		OSU	North America	Kearney, NE, United States
A12398	Cynodon dactylon		OSU	North America	Omaha, NE, United States
A12402	Cynodon dactylon		OSU	North America	Ames, IA, United States
A12405	Cynodon dactylon		OSU	North America	Ames, IA, United States
A12406	Cynodon dactylon		OSU	North America	Kansas City, KS, United States
A12407	Cynodon dactylon		OSU	North America	Kansas City, MO, United States
A12408	Cynodon dactylon		OSU	North America	Denver, CO, United States
A12422	Cynodon dactylon		OSU	North America	Urbana, IL, United States
A12423	Cynodon dactylon		OSU	North America	Quincy, IL, United States
A12424	Cynodon dactylon		OSU	North America	Manhattan, KS, United States
A12425	Cynodon dactylon		OSU	North America	Manhattan, KS, United States
A12426	Cynodon dactylon		OSU	North America	Kansas City, MO, United States
A12427	Cynodon dactylon		OSU	North America	Kansas City, MO, United States
A12428	Cynodon dactylon		OSU	North America	Mexico, MO, United States
A12429	Cynodon dactylon		OSU	North America	Guymon, OK, United States
A12430	Cynodon dactylon		OSU	North America	Denver, CO, United States
A12431	Cynodon dactylon		OSU	North America	New Brunswick, NJ, United States
A12432	Cynodon dactylon		OSU	North America	Adelphia, NJ, United States
A12433	Cynodon dactylon		OSU	North America	New Brunswick, NJ, United States
A12434	Cynodon dactylon		OSU	North America	Riverside, CA, United States
A12435	Cynodon dactylon		OSU	North America	Riverside, CA, United States
A12436	Cynodon dactylon		OSU	Europe	Pisa, Italy
A12437	Cynodon dactylon		OSU	Europe	Albufeira, Portugal
A12438	Cynodon dactylon		OSU	Europe	Barcelona, Spain
A12439	Cynodon dactylon		OSU	Europe	Seville, Spain
A12440	Cynodon dactylon		OSU	Europe	Madrid, Spain
Celebration	Cynodon dactylon		MSU	Australia	Australia
Choice	Cynodon dactylon		MSU	North America	United States
Discovery	Cynodon dactylon		MSU	Australia	Australia
Grif17326	Cynodon dactylon (L.) Pers.		USDA	Eurasia	Russian Federation
MSU105	Cynodon dactylon		MSU	North America	United States
MSU1080	Cynodon dactylon		MSU	North America	United States
MSU109	Cynodon dactylon		MSU	North America	United States
MSU112	Cynodon dactylon		MSU	North America	United States
MSU116	Cynodon dactylon		MSU	North America	United States
MSU125	Cynodon dactylon		MSU	North America	United States
MSU154	Cynodon dactylon		MSU	North America	United States
MSU1541	Cynodon dactylon		MSU	North America	United States
MSU1542	Cynodon dactylon		MSU	North America	United States
MSU178	Cynodon dactylon		MSU	North America	United States
MSU278	Cynodon dactylon		MSU	North America	United States
MSU74	Cynodon dactylon		MSU	North America	United States
MSU75	Cynodon dactylon		MSU	North America	United States
MSU91	Cynodon dactylon		MSU	North America	United States
MSU97	Cynodon dactylon		MSU	North America	United States
MSU98	Cynodon dactylon		MSU	North America	United States
NR24	Cynodon dactylon		OSU	Europe	Bulgaria
NR28	Cynodon dactylon		OSU	Europe	Spain
NR34	Cynodon dactylon		OSU	Europe	Italy
PI193267	Cynodon dactylon (L.) Pers. var. dactylon		USDA	Asia	Afghanistan
PI203456	Cynodon dactylon (L.) Pers. var. dactylon	4	USDA	Asia	Turkey	2.06
PI206553	Cynodon dactylon (L.) Pers. var. dactylon	4	USDA	Europe	Greece	2.41
PI206657	Cynodon dactylon		USDA	Asia	Turkey
PI220588	Cynodon dactylon (L.) Pers. var. dactylon	4	USDA	Asia	Afghanistan	2.01
PI223248	Cynodon dactylon (L.) Pers. var. afghanicus J. R. Harlan & de Wet	4	USDA	Asia	Afghanistan	2.41
PI223249	Cynodon dactylon (L.) Pers. var. dactylon	2	USDA	Asia	Afghanistan	1.59
PI224314	Cynodon dactylon (L.) Pers. var. dactylon	3	USDA	Africa	South Africa	1.79
PI224566	Cynodon dactylon (L.) Pers. var. dactylon	2	USDA	Africa	Zimbabwe	0.99
PI224568	Cynodon dactylon (L.) Pers. var. dactylon	4	USDA	Africa	Zimbabwe	1.93
PI224692	Cynodon dactylon (L.) Pers. var. dactylon	4	USDA	Africa	Zambia	1.84
PI224694	Cynodon dactylon (L.) Pers. var. dactylon	4	USDA	Africa	Zambia	2.02
PI225046	Cynodon dactylon (L.) Pers. var. dactylon	2	USDA	Africa	Tanzania	1.06
PI225591	Cynodon dactylon (L.) Pers. var. dactylon	2	USDA	Africa	Tanzania	1.04
PI246600	Cynodon dactylon (L.) Pers. var. dactylon	4	USDA	Asia	India	1.9
PI251108	Cynodon dactylon (L.) Pers. var. dactylon	4	USDA	Europe	North Macedonia	1.87
PI251809	Cynodon dactylon (L.) Pers. var. dactylon	4	USDA	Europe	Italy	2.42
PI267985	Cynodon dactylon (L.) Pers. var. dactylon	4	USDA	Asia	Pakistan	2.17
PI286584	Cynodon transvaalensis Burtt Davy		USDA	Asia	India
PI287147	Cynodon dactylon (L.) Pers. var. dactylon	3	USDA	Asia	India	1.68
PI287149	Cynodon dactylon (L.) Pers. var. dactylon	3	USDA	Asia	India	1.67
PI287151	Cynodon dactylon (L.) Pers. var. dactylon	4	USDA	Asia	India	1.85
PI287154	Cynodon dactylon (L.) Pers. var. dactylon	3	USDA	Asia	India	1.72
PI287155	Cynodon dactylon (L.) Pers. var. dactylon	3	USDA	Asia	India	1.6
PI287156	Cynodon dactylon (L.) Pers. var. dactylon	2	USDA	Asia	India	1.23
PI287157	Cynodon dactylon (L.) Pers. var. dactylon	4	USDA	Asia	India	1.84
PI287244	Cynodon dactylon (L.) Pers. var. dactylon	4	USDA	Asia	India	1.85
PI287246	Cynodon dactylon (L.) Pers. var. dactylon	3	USDA	Asia	India	1.77
PI287247	Cynodon dactylon (L.) Pers. var. dactylon	4	USDA	Asia	India	2.03
PI287256	Cynodon dactylon (L.) Pers. var. dactylon	2	USDA	Asia	Sri Lanka	1.16
PI287795	Cynodon dactylon (L.) Pers. var. dactylon		USDA	Asia	Sri Lanka
PI288043	Cynodon dactylon (L.) Pers. var. dactylon	2	USDA	Asia	India	0.95
PI288216	Cynodon dactylon (L.) Pers. var. dactylon	4	USDA	Africa	Madagascar	2.09
PI288221	Cynodon dactylon (L.) Pers. var. coursii (A. Camus) J. R. Harlan & de Wet	4	USDA	Africa	Madagascar	2.13
PI288676	Cynodon dactylon (L.) Pers. var. dactylon	2	USDA	Africa	Madagascar	1.15
PI289714	Cynodon dactylon (L.) Pers. var. coursii (A. Camus) J. R. Harlan & de Wet	4	USDA	Africa	Madagascar	1.99
PI289716	Cynodon dactylon (L.) Pers. var. coursii (A. Camus) J. R. Harlan & de Wet	3	USDA	Africa	Madagascar	1.72
PI289747	Cynodon dactylon (L.) Pers. var. polevansii (Stent) J. R. Harlan & de Wet	3	USDA	Africa	South Africa	1.72
PI289750	Cynodon dactylon (L.) Pers. var. polevansii (Stent) J. R. Harlan & de Wet	4	USDA	Africa	South Africa	2.56
PI289913	Cynodon dactylon (L.) Pers. var. dactylon	4	USDA	Africa	South Africa	1.94
PI289922	Cynodon transvaalensis Burtt Davy		USDA	Africa	South Africa
PI289923	Cynodon transvaalensis Burtt Davy		USDA	Africa	South Africa
PI290656	Cynodon dactylon (L.) Pers. var. dactylon	2	USDA	Africa	South Africa	1.22
PI290657	Cynodon dactylon (L.) Pers. var. dactylon	2	USDA	Africa	South Africa	1.36
PI290667	Cynodon dactylon (L.) Pers. var. dactylon	3	USDA	Africa	South Africa	1.68
PI290812	Cynodon transvaalensis Burtt Davy	4	USDA	Africa	South Africa	2.16
PI290813	Cynodon transvaalensis Burtt Davy	4	USDA	Africa	South Africa	2.52
PI290872	Cynodon transvaalensis Burtt Davy	4	USDA	Africa	South Africa	2.07
PI290880	Cynodon dactylon (L.) Pers. var. dactylon	4	USDA	Africa	South Africa	2.08
PI290881	Cynodon dactylon (L.) Pers. var. dactylon	4	USDA	Africa	South Africa	2.15
PI290883	Cynodon dactylon (L.) Pers. var. dactylon	4	USDA	Africa	South Africa	2.01
PI290885	Cynodon dactylon (L.) Pers. var. dactylon	4	USDA	Africa	South Africa	2.08
PI290886	Cynodon dactylon (L.) Pers. var. dactylon		USDA	Africa	South Africa
PI290887	Cynodon dactylon (L.) Pers. var. dactylon	4	USDA	Africa	South Africa	2.24
PI290894	Cynodon transvaalensis Burtt Davy		USDA	Africa	South Africa
PI290895	Cynodon dactylon (L.) Pers. var. dactylon	2	USDA	Africa	South Africa	1.07
PI290901	Cynodon dactylon (L.) Pers. var. dactylon	2	USDA	Africa	South Africa	1.52
PI290905	Cynodon transvaalensis Burtt Davy		USDA	Africa	South Africa
PI291146	Cynodon dactylon (L.) Pers. var. dactylon	4	USDA	Africa	South Africa	1.89
PI291148	Cynodon dactylon (L.) Pers. var. dactylon	4	USDA	Africa	South Africa	2.18
PI291151	Cynodon dactylon (L.) Pers. var. dactylon	4	USDA	Africa	South Africa	1.96
PI291153	Cynodon dactylon (L.) Pers. var. dactylon	4	USDA	Africa	South Africa	1.86
PI291155	Cynodon dactylon (L.) Pers. var. dactylon	4	USDA	Africa	South Africa	1.84
PI291157	Cynodon dactylon (L.) Pers. var. dactylon	4	USDA	Africa	South Africa	1.94
PI291160	Cynodon dactylon (L.) Pers. var. dactylon	4	USDA	Africa	South Africa	1.95
PI291161	Cynodon dactylon (L.) Pers. var. dactylon	2	USDA	Africa	South Africa	1.56
PI291164	Cynodon dactylon (L.) Pers. var. dactylon	3	USDA	Africa	South Africa	1.72
PI291166	Cynodon dactylon (L.) Pers. var. dactylon	3	USDA	Africa	South Africa	1.62
PI291167	Cynodon dactylon (L.) Pers. var. dactylon	4	USDA	Africa	South Africa	1.9
PI291169	Cynodon dactylon (L.) Pers. var. dactylon	3	USDA	Africa	South Africa	1.74
PI291171	Cynodon dactylon (L.) Pers. var. dactylon	3	USDA	Africa	South Africa	1.61
PI291172	Cynodon dactylon (L.) Pers. var. dactylon	4	USDA	Africa	South Africa	2.38
PI291175	Cynodon dactylon (L.) Pers. var. dactylon	3	USDA	Africa	South Africa	1.64
PI291180	Cynodon dactylon (L.) Pers. var. dactylon	4	USDA	Africa	South Africa	1.86
PI291586	Cynodon dactylon (L.) Pers. var. dactylon	4	USDA	Africa	Zimbabwe	2.07
PI291610	Cynodon dactylon (L.) Pers. var. dactylon	4	USDA	Africa	South Africa	2.07
PI291716	Cynodon dactylon (L.) Pers. var. dactylon	4	USDA	Africa	South Africa	2.29
PI291718	Cynodon dactylon (L.) Pers. var. dactylon	4	USDA	Africa	South Africa	1.96
PI291719	Cynodon dactylon (L.) Pers. var. dactylon	4	USDA	Africa	South Africa	1.85
PI291726	Cynodon dactylon (L.) Pers. var. dactylon	3	USDA	Africa	South Africa	1.64
PI291729	Cynodon dactylon (L.) Pers. var. dactylon	3	USDA	Africa	South Africa	1.53
PI291730	Cynodon dactylon (L.) Pers. var. dactylon	2	USDA	Africa	South Africa	1.24
PI291733	Cynodon dactylon (L.) Pers. var. dactylon	3	USDA	Africa	South Africa	1.64
PI291734	Cynodon dactylon (L.) Pers. var. dactylon	4	USDA	Africa	South Africa	1.85
PI291740	Cynodon dactylon (L.) Pers. var. dactylon	3	USDA	Africa	South Africa	1.63
PI291741	Cynodon dactylon (L.) Pers. var. dactylon	3	USDA	Africa	South Africa	1.71
PI291745	Cynodon dactylon (L.) Pers. var. dactylon	3	USDA	Africa	South Africa	1.63
PI291746	Cynodon dactylon (L.) Pers. var. dactylon	4	USDA	Africa	South Africa	2.04
PI291747	Cynodon dactylon (L.) Pers. var. dactylon	4	USDA	Africa	South Africa	2.25
PI291749	Cynodon dactylon (L.) Pers. var. dactylon	3	USDA	Africa	South Africa	1.74
PI291750	Cynodon dactylon (L.) Pers. var. dactylon	4	USDA	Africa	South Africa	1.86
PI291962	Cynodon dactylon (L.) Pers. var. dactylon	4	USDA	Africa	Kenya	1.86
PI291964	Cynodon dactylon (L.) Pers. var. dactylon	4	USDA	Africa	South Africa	2.17
PI291968	Cynodon dactylon (L.) Pers. var. dactylon	3	USDA	Africa	Kenya	1.67
PI291974	Cynodon dactylon (L.) Pers. var. dactylon	2	USDA	Africa	Kenya	0.81
PI291977	Cynodon dactylon (L.) Pers. var. dactylon	2	USDA	Africa	Kenya	1.25
PI291981	Cynodon transvaalensis Burtt Davy		USDA	Africa	Ethiopia
PI292039	Cynodon dactylon (L.) Pers. var. dactylon	4	USDA	Africa	Mozambique	2.22
PI292046	Cynodon dactylon (L.) Pers. var. dactylon	3	USDA	Africa	Zambia	1.68
PI292050	Cynodon dactylon (L.) Pers. var. dactylon	3	USDA	Africa	Zambia	1.67
PI292052	Cynodon dactylon (L.) Pers. var. dactylon	3	USDA	Africa	Zambia	1.7
PI292059	Cynodon dactylon (L.) Pers. var. dactylon	2	USDA	Africa	Tanzania	0.94
PI292142	Cynodon dactylon (L.) Pers. var. dactylon	4	USDA	Africa	Ghana	2
PI292143	Cynodon dactylon (L.) Pers. var. dactylon	2	USDA	Africa	Ghana	1.45
PI292231	Cynodon dactylon (L.) Pers. var. dactylon	4	USDA	Africa	Ghana	2.04
PI292233	Cynodon dactylon (L.) Pers. var. dactylon	4	USDA	Africa	Ghana	2.12
PI292248	Cynodon dactylon (L.) Pers. var. dactylon	4	USDA	Asia	Philippines	1.9
PI292249	Cynodon dactylon (L.) Pers. var. dactylon	2	USDA	Asia	Philippines	1.46
PI292250	Cynodon dactylon (L.) Pers. var. dactylon	3	USDA	Asia	Philippines	1.63
PI292252	Cynodon dactylon (L.) Pers. var. dactylon	3	USDA	Asia	Philippines	1.61
PI292509	Cynodon dactylon (L.) Pers. var. dactylon	3	USDA	Asia	Japan	1.65
PI292573	Cynodon dactylon (L.) Pers. var. dactylon	3	USDA	Asia	Thailand	1.72
PI293639	Cynodon dactylon (L.) Pers. var. dactylon	3	USDA	Africa	Kenya	1.69
PI293644	Cynodon dactylon (L.) Pers. var. dactylon	4	USDA	Africa	Kenya	1.91
PI295339	Cynodon dactylon (L.) Pers. var. dactylon	4	USDA	Europe	Germany	2.19
PI297827	Cynodon dactylon (L.) Pers. var. aridus J. R. Harlan & de Wet	2	USDA	Asia	Israel	1.27
PI315902	Cynodon dactylon (L.) Pers. var. dactylon	2	USDA	Europe	Germany	1.1
PI364484	Cynodon dactylon (L.) Pers. var. dactylon	2	USDA	Africa	South Africa	1.35
PI364485	Cynodon dactylon (L.) Pers. var. dactylon	2	USDA	Africa	South Africa	1.01
PI364490	Cynodon dactylon (L.) Pers. var. dactylon	3	USDA	Africa	South Africa	1.67
PI365499	Cynodon dactylon (L.) Pers. var. dactylon	4	USDA	Africa	South Africa	1.8
PI409738	Cynodon dactylon (L.) Pers. var. dactylon	4	USDA	Africa	South Africa	2.04
PI531090	Cynodon dactylon (L.) Pers. var. dactylon	4	USDA	North America	United States	2.08
PI547108	Cynodon dactylon (L.) Pers. var. dactylon	3	USDA	North America	United States	1.72
PI547109	Cynodon dactylon (L.) Pers. var. dactylon	4	USDA	North America	United States	2.48
PI564236	Cynodon dactylon (L.) Pers. var. dactylon	4	USDA	Australia	Australia	1.98
PI564237	Cynodon dactylon (L.) Pers. var. dactylon	2	USDA	Australia	Australia	1.58
PI564240	Cynodon dactylon (L.) Pers. var. dactylon	4	USDA	Africa	Zimbabwe	2.2
PI572233	Cynodon dactylon (L.) Pers. var. dactylon	3	USDA	Africa	Zimbabwe	1.72
PI601059	Cynodon dactylon (L.) Pers. var. dactylon	3	USDA	North America	United States	1.71
PI601157	Cynodon dactylon (L.) Pers. var. dactylon	4	USDA	North America	United States	2.08
PI601976	Cynodon dactylon		USDA	North America	United States
PI606545	Cynodon dactylon (L.) Pers. var. dactylon	3	USDA	North America	United States	1.64
PI618587	Cynodon dactylon (L.) Pers.	4	USDA	North America	United States	2.14
PI641703	Cynodon dactylon (L.) Pers.	4	USDA	Asia	China	2.01
PI647875	Cynodon dactylon (L.) Pers.	4	USDA	Australia	Australia	1.82
PI647876	Cynodon dactylon (L.) Pers.	4	USDA	Australia	Australia	1.91
PI647878	Cynodon transvaalensis Burtt Davy		USDA	Australia	Australia
PI647879	Cynodon transvaalensis Burtt Davy		USDA	Australia	Australia
PI671960	Cynodon dactylon (L.) Pers.		USDA	North America	United States
PI673406	Cynodon dactylon (L.) Pers. var. dactylon		USDA	North America	United States
PI673407	Cynodon dactylon (L.) Pers. var. dactylon		USDA	North America	United States
PI673408	Cynodon dactylon (L.) Pers. var. dactylon		USDA	North America	United States
PI673409	Cynodon dactylon (L.) Pers. var. dactylon		USDA	NA	NA
Quickstand	Cynodon dactylon		OSU	NA	NA
Trans1	Cynodon transvaalensis		MSU	North America	United States
Trans2	Cynodon transvaalensis		MSU	North America	United States
U3	Cynodon dactylon		OSU	NA	NA

## Sheet: Q Values from ADMIXTURE
Q values from ADMIXTURE analysis
Taxa	Subpopulatiuon 1	Subpopulatiuon 2	Subpopulatiuon 3	Subpopulatiuon 4	Grouping
A12269	0.99997	1e-05	1e-05	1e-05	A
A12342	0.99997	1e-05	1e-05	1e-05	A
A12347	0.99997	1e-05	1e-05	1e-05	A
A12367	0.99997	1e-05	1e-05	1e-05	A
A12395	0.99997	1e-05	1e-05	1e-05	A
PI246600	0.99997	1e-05	1e-05	1e-05	A
PI267985	0.99997	1e-05	1e-05	1e-05	A
PI287244	0.99997	1e-05	1e-05	1e-05	A
PI290901	0.99997	1e-05	1e-05	1e-05	A
PI291750	0.99997	1e-05	1e-05	1e-05	A
PI292248	0.99997	1e-05	1e-05	1e-05	A
PI292250	0.99997	1e-05	1e-05	1e-05	A
PI547109	0.99997	1e-05	1e-05	1e-05	A
PI601157	0.99997	1e-05	1e-05	1e-05	A
PI601976	0.99997	1e-05	1e-05	1e-05	A
A12438	0.999968	1e-05	1.2e-05	1e-05	A
PI291747	0.999968	1e-05	1.2e-05	1e-05	A
PI531090	0.999968	1e-05	1.2e-05	1e-05	A
PI641703	0.999967	1e-05	1.3e-05	1e-05	A
PI547108	0.999966	1e-05	1.4e-05	1e-05	A
A12313	0.999961	1e-05	1.9e-05	1e-05	A
PI618587	0.986628	1e-05	1e-05	0.013352	A
PI291180	0.958543	0.024536	0.016911	1e-05	A
PI292142	0.895997	0.017078	0.086916	1e-05	A
PI223249	0.848651	1e-05	1e-05	0.151329	A
PI287256	0.842596	1e-05	1e-05	0.157384	A
A12434	0.84216	1e-05	1e-05	0.15782	A
PI292249	0.840882	1e-05	1e-05	0.159098	A
PI291733	0.838843	1e-05	1e-05	0.161137	A
PI287155	0.827988	1e-05	1e-05	0.171992	A
PI287156	0.827309	1e-05	1e-05	0.172671	A
PI287154	0.823093	1e-05	1e-05	0.176887	A
Choice	0.778083	1e-05	1e-05	0.221897	A
PI291977	0.775539	0.224441	1e-05	1e-05	A
PI220588	0.773128	1e-05	1e-05	0.226852	A
NR28	0.761984	0.237996	1e-05	1e-05	A
PI287157	0.749842	0.199029	0.05112	1e-05	A
PI291962	0.729667	0.270313	1e-05	1e-05	A
PI286584	0.728995	0.270985	1e-05	1e-05	A
PI671960	0.707391	0.15807	1e-05	0.134529	A
MSU105	0.664311	0.321093	0.014586	1e-05	A
A12439	0.657358	0.142709	1e-05	0.199923	A
MSU112	0.642656	0.23463	0.01859	0.104124	A
MSU109	0.642533	0.213118	0.049152	0.095196	A
MSU97	0.627524	0.206525	0.028645	0.137307	A
PI564237	0.589755	0.399797	0.010437	1e-05	A
PI564240	0.581949	0.314345	0.103696	1e-05	A
PI292233	0.573026	0.426954	1e-05	1e-05	A
PI564236	0.570191	0.207381	0.222418	1e-05	A
A12436	0.569589	1e-05	1e-05	0.430391	A
PI365499	0.564939	0.389462	0.045589	1e-05	A
MSU1542	0.56435	0.43563	1e-05	1e-05	A
Celebration	0.55886	0.208175	0.232955	1e-05	A
Discovery	0.557178	0.201289	0.241523	1e-05	A
PI224694	0.555861	0.043601	0.400528	1e-05	A
PI647879	0.554148	0.206574	0.239267	1e-05	A
PI647876	0.553354	0.209943	0.236693	1e-05	A
PI292231	0.552091	0.447889	1e-05	1e-05	A
PI292509	0.548101	0.360002	0.091888	1e-05	A
A12378	0.547589	0.151091	0.30131	1e-05	A
PI647875	0.54636	0.217104	0.236526	1e-05	A
A12440	0.545739	1e-05	1e-05	0.454241	A
PI290885	0.545598	0.359886	0.094506	1e-05	A
PI290883	0.545111	0.360275	0.094604	1e-05	A
PI287151	0.541607	0.082032	0.376351	1e-05	A
PI291740	0.540692	0.085632	0.373666	1e-05	A
PI291586	0.54012	0.359003	0.100867	1e-05	A
A12423	0.538525	1.1e-05	1e-05	0.461453	A
PI287247	0.538244	0.087762	0.373984	1e-05	A
PI292252	0.538114	0.106637	0.355239	1e-05	A
PI295339	0.537754	0.446227	0.016009	1e-05	A
A12427	0.536492	1e-05	1e-05	0.463488	A
Quickstand	0.53415	1e-05	1e-05	0.46583	A
PI291968	0.532286	0.105829	0.361875	1e-05	A
A12435	0.526954	1e-05	1e-05	0.473026	A
A12433	0.526409	1e-05	1e-05	0.473571	A
PI287147	0.524956	0.105884	0.36915	1e-05	A
A12430	0.522308	1e-05	1e-05	0.477672	A
A12426	0.52134	1e-05	1e-05	0.47864	A
A12408	0.519708	1e-05	1e-05	0.480272	A
A12281	0.518529	1e-05	1e-05	0.481451	A
MSU98	0.517196	0.482784	1e-05	1e-05	A
PI287149	0.491861	0.164574	0.343555	1e-05	A
PI606545	0.397223	0.251352	1e-05	0.351415	A
PI288676	1e-05	0.99997	1e-05	1e-05	B
PI289923	1e-05	0.99997	1e-05	1e-05	B
PI290812	1e-05	0.99997	1e-05	1e-05	B
PI290813	1e-05	0.99997	1e-05	1e-05	B
PI290872	1e-05	0.99997	1e-05	1e-05	B
PI290894	1e-05	0.99997	1e-05	1e-05	B
PI290895	1e-05	0.99997	1e-05	1e-05	B
PI290905	1e-05	0.99997	1e-05	1e-05	B
PI291981	1e-05	0.99997	1e-05	1e-05	B
Trans1	1e-05	0.99997	1e-05	1e-05	B
Trans2	1e-05	0.99997	1e-05	1e-05	B
PI364485	1e-05	0.875782	1e-05	0.124198	B
PI364484	1e-05	0.872384	1e-05	0.127596	B
PI225046	1e-05	0.862153	0.101364	0.036473	B
PI292143	1e-05	0.858022	1e-05	0.141958	B
PI224566	1e-05	0.848978	1e-05	0.151002	B
PI290887	1e-05	0.814654	0.185326	1e-05	B
MSU278	0.226654	0.773326	1e-05	1e-05	B
PI289716	0.127786	0.705563	0.166642	1e-05	B
MSU75	0.302654	0.697326	1e-05	1e-05	B
PI289714	0.12577	0.696516	0.177704	1e-05	B
MSU125	0.308183	0.691797	1e-05	1e-05	B
PI288216	0.132459	0.690371	0.176025	0.001145	B
PI288221	0.138393	0.680653	0.180944	1e-05	B
PI315902	0.135613	0.661697	0.20268	1e-05	B
MSU74	0.352065	0.647915	1e-05	1e-05	B
MSU91	0.353804	0.646176	1e-05	1e-05	B
MSU1080	0.369547	0.630428	1.5e-05	1e-05	B
PI225591	0.012775	0.628825	0.017291	0.341109	B
PI291964	1e-05	0.628262	0.371718	1e-05	B
PI251108	1e-05	0.618377	0.381603	1e-05	B
MSU1541	0.40776	0.59222	1e-05	1e-05	B
MSU116	0.380022	0.587412	0.032556	1e-05	B
MSU154	0.43379	0.56619	1.1e-05	1e-05	B
MSU178	0.472788	0.527192	1e-05	1e-05	B
PI292059	0.032621	0.507207	0.026254	0.433919	B
PI224314	1e-05	1e-05	0.99997	1e-05	C
PI224692	1e-05	1e-05	0.99997	1e-05	C
PI289747	1e-05	1e-05	0.99997	1e-05	C
PI290667	1e-05	1e-05	0.99997	1e-05	C
PI291146	1e-05	1e-05	0.99997	1e-05	C
PI291148	1e-05	1e-05	0.99997	1e-05	C
PI291151	1e-05	1e-05	0.99997	1e-05	C
PI291153	1e-05	1e-05	0.99997	1e-05	C
PI291155	1e-05	1e-05	0.99997	1e-05	C
PI291160	1e-05	1e-05	0.99997	1e-05	C
PI291161	1e-05	1e-05	0.99997	1e-05	C
PI291167	1e-05	1e-05	0.99997	1e-05	C
PI291169	1e-05	1e-05	0.99997	1e-05	C
PI291171	1e-05	1e-05	0.99997	1e-05	C
PI291175	1e-05	1e-05	0.99997	1e-05	C
PI291610	1e-05	1e-05	0.99997	1e-05	C
PI291716	1e-05	1e-05	0.99997	1e-05	C
PI291718	1e-05	1e-05	0.99997	1e-05	C
PI291719	1e-05	1e-05	0.99997	1e-05	C
PI291726	1e-05	1e-05	0.99997	1e-05	C
PI291729	1e-05	1e-05	0.99997	1e-05	C
PI291730	1e-05	1e-05	0.99997	1e-05	C
PI291734	1e-05	1e-05	0.99997	1e-05	C
PI292046	1e-05	1e-05	0.99997	1e-05	C
PI292050	1e-05	1e-05	0.99997	1e-05	C
PI292052	1e-05	1e-05	0.99997	1e-05	C
PI409738	1e-05	1e-05	0.99997	1e-05	C
PI224568	1e-05	1.1e-05	0.999969	1e-05	C
PI291172	1.3e-05	1e-05	0.999967	1e-05	C
PI291746	1e-05	1.3e-05	0.999967	1e-05	C
PI364490	1e-05	1.4e-05	0.999966	1e-05	C
PI291741	1e-05	0.058435	0.941545	1e-05	C
PI291164	1e-05	0.092307	0.907673	1e-05	C
PI290880	1e-05	0.095252	0.904728	1e-05	C
PI293639	0.101461	1e-05	0.898519	1e-05	C
PI291745	0.120935	1e-05	0.879045	1e-05	C
PI291749	0.243022	1e-05	0.756958	1e-05	C
PI291157	0.271028	1e-05	0.728952	1e-05	C
PI290657	1e-05	0.293097	0.706883	1e-05	C
PI290656	1e-05	0.293706	0.706274	1e-05	C
PI290881	1e-05	0.297997	0.701983	1e-05	C
PI289913	1e-05	0.326623	0.673357	1e-05	C
PI287246	0.15256	1e-05	0.615094	0.232336	C
PI289750	1e-05	0.393148	0.606832	1e-05	C
PI292039	0.07622	0.32547	0.5983	1e-05	C
PI293644	1e-05	0.403228	0.596752	1e-05	C
PI572233	1e-05	0.409635	0.590345	1e-05	C
PI290886	1e-05	0.41504	0.58494	1e-05	C
PI673409	0.094019	0.074953	0.579413	0.251614	C
PI673407	1e-05	1e-05	0.556863	0.443117	C
PI289922	1e-05	0.468618	0.531362	1e-05	C
PI647878	0.1006	0.384012	0.515378	1e-05	C
PI673406	0.060335	0.032304	0.48542	0.421941	C
PI291166	0.200186	0.351646	0.448158	1e-05	C
A12193	1e-05	1e-05	1e-05	0.99997	D
A12397	1e-05	1e-05	1e-05	0.99997	D
A12398	1e-05	1e-05	1e-05	0.99997	D
A12406	1e-05	1e-05	1e-05	0.99997	D
A12407	1e-05	1e-05	1e-05	0.99997	D
A12422	1e-05	1e-05	1e-05	0.99997	D
A12424	1e-05	1e-05	1e-05	0.99997	D
A12428	1e-05	1e-05	1e-05	0.99997	D
A12432	1e-05	1e-05	1e-05	0.99997	D
Grif17326	1e-05	1e-05	1e-05	0.99997	D
NR34	1e-05	1e-05	1e-05	0.99997	D
PI193267	1e-05	1e-05	1e-05	0.99997	D
PI206553	1e-05	1e-05	1e-05	0.99997	D
PI206657	1e-05	1e-05	1e-05	0.99997	D
PI251809	1e-05	1e-05	1e-05	0.99997	D
PI287795	1e-05	1e-05	1e-05	0.99997	D
A12437	1e-05	1.1e-05	1e-05	0.999969	D
NR24	1.9e-05	1e-05	1e-05	0.999961	D
PI601059	0.035097	1e-05	1e-05	0.964883	D
PI223248	0.131765	1e-05	1e-05	0.868215	D
PI203456	0.076108	1e-05	0.142078	0.781804	D
A12429	0.22129	1e-05	1e-05	0.77869	D
PI288043	0.236975	1.2e-05	1e-05	0.763003	D
PI297827	0.237384	1e-05	1e-05	0.762596	D
A12402	1e-05	0.298481	1e-05	0.701499	D
A12405	1e-05	0.303582	1e-05	0.696398	D
A12425	1e-05	0.309575	1e-05	0.690405	D
A12431	1e-05	0.315336	1e-05	0.684644	D
PI673408	1e-05	0.328626	0.049992	0.621372	D
U3	0.31843	0.015812	0.118353	0.547405	D
PI292573	0.397594	1e-05	0.057608	0.544788	D
PI291974	0.407515	1e-05	0.051079	0.541396	D
